# Supplementary material
Source: publisher figshare collection journal article supplement (https://tandf.figshare.com/ndownloader/files/22317282)
Supplement: Supplementary file 1 [file 22317282]

**Supplemental Table 1. Descriptive statistics of outcome measures including type 2 diabetes management and care and healthcare resource use in people with type 2 diabetes**

| **Characteristics** | **N (%)** |
| --- | --- |
| **HbA1c testing** | |
| Tested | 607 (13.3) |
| HbA1c level (n, mean ± SD) | 485 (6.9 ± 1.3) |
| Not tested | 3,945 (86.7) |
| **HbA1c control (n = 485)a** | |
| HbA1c controlled (less than 7.0%) | 298 (61.4) |
| HbA1c not controlled (7.0% and above) | 187 (38.6) |
| **BP testing** | |
| Tested | 2,202 (48.4) |
| Systolic BP level (n, mean ± SD) | 2,201 (129.9 ± 16.9) |
| Diastolic BP level (n, mean ± SD) | 2,201 (76.1 ± 10.6) |
| Not tested | 2,350 (51.6) |
| **BP control (n = 2201)a** | |
| BP less than 130/80 mmHg | 852 (38.7) |
| BP 130/80 mmHg and more | 1,349 (61.3) |
| **LDL-C testing** | |
| Tested | 773 (17.0) |
| LDL-C level (n, mean ± SD) | 630 (87.3 ± 35.5) |
| Not tested | 3,779 (83.0) |
| **LDL-C control (n = 630)a** | |
| Less than 100 mg/dL | 430 (68.3) |
| 100 mg/dl and above | 200 (31.7) |
| **Hypoglycemic events in the past 3 months (n = 721)a** | |
| Event | 615 (13.5) |
| No event | 106 (2.3) |
| Missing (i.e., severity unknown or individuals not in the diabetes module were not asked) | 3,831 (84.2) |
| **Healthcare resource utilization in the past 6 months in individuals with type 2 diabetes** | |
| **Emergency room visits** | |
| Yes | 3,666 (80.5) |
| No | 886 (19.5) |
| **Hospitalization** | |
| Yes | 3,952 (86.8) |
| No | 600 (13.2) |
| **Number of emergency room visits (mean ± SD)** | 0.32 ± 0.92 |
| **Number of hospitalizations (mean ± SD)** | 0.20 ± 1.4 |

HbA1c = Glycated hemoglobin; LDL-C = Low-density lipoprotein cholesterol; BP = blood pressure; SD=standard deviation.

aRepresents the number of patients who had a valid laboratory test value.
